# Supplementary material
Source: PubMed Central journal article supplement (PMC4790482)
Supplement: cosk004134.ww2_default.pdf [file cosk004134.ww2_default.pdf]

**Appendix 2:** Birthweights of live births between 22 and 26 weeks of gestation in 2006 in England by gestational age, sex and multiple birth [posted as supplied by author]

| Live births     | (n) [missing Birthweight] | Birthweight grams |                     |          |               |
|-----------------|---------------------------|-------------------|---------------------|----------|---------------|
|                 |                           | Median            | Interquartile range | Range    | n% <500 grams |
| All babies      | 22 weeks (150) - [2]      | 479               | 439-535             | 200-759  | 84(56%)       |
|                 | 23 weeks (335) - [4]      | 579               | 519-629             | 365-814  | 48(14.3%)     |
|                 | 24 weeks (442) - [0]      | 665               | 605-730             | 337-995  | 17(3.9%)      |
|                 | 25 weeks (521) - [0]      | 774               | 699-850             | 360-1126 | 12(2.3%)      |
|                 | 26 weeks (580) - [0]      | 879               | 785-970             | 356-1524 | 9(1.6%)       |
|                 | Total (2028) - [6]        | 717               | 600-841             | 200-1524 | 170(8.4%)     |
| Gestational age |                           |                   |                     |          |               |
| 22 weeks        | boys (85) - [0]           | 500               | 460-550             | 365-759  |               |
|                 | girls (65) - [2]          | 465               | 419-500             | 200-699  |               |
|                 | singletons (118) - [2]    | 480               | 449-540             | 209-759  |               |
|                 | multiples (32) - [0]      | 474               | 419-514             | 200-639  |               |
| 23 weeks        | boys (185) - [0]          | 603               | 545-649             | 419-814  |               |
|                 | girls (149) - [3]         | 560               | 509-600             | 365-790  |               |
|                 | singletons (224) - [4]    | 589               | 536-639             | 400-814  |               |
|                 | multiples (111) - [0]     | 560               | 509-620             | 365-810  |               |
| 24 weeks        | boys (224) - [0]          | 681               | 620-751             | 337-995  |               |
|                 | girls (218) - [0]         | 649               | 600-709             | 379-865  |               |
|                 | singletons (324) - [0]    | 670               | 610-731             | 379-995  |               |
|                 | multiples (118) - [0]     | 660               | 600-720             | 337-930  |               |
| 25 weeks        | boys (275) - [0]          | 800               | 720-870             | 360-1126 |               |
|                 | girls (246) - [0]         | 750               | 680-810             | 393-1125 |               |
|                 | singletons (410) - [0]    | 779               | 699-860             | 439-1126 |               |
|                 | multiples (111) - [0]     | 740               | 629-810             | 360-1000 |               |
| 26 weeks        | boys (289) - [0]          | 904               | 800-995             | 426-1399 |               |
|                 | girls (291) - [0]         | 850               | 773-949             | 356-1524 |               |
|                 | singletons (424) - [0]    | 884               | 785-979             | 356-1524 |               |
|                 | multiples (156) - [0]     | 858               | 785-953             | 476-1279 |               |
| Total           | boys (1058) - [0]         | 730               | 611-862             | 337-1399 | 72(6.8%)      |
|                 | girls (969) - [5]         | 699               | 579-819             | 200-1524 | 97(10%)       |
|                 | singletons (1500) - [6]   | 720               | 600-850             | 209-1524 | 118(7.9%)     |
|                 | multiples (528) - [0]     | 689               | 578-819             | 200-1279 | 52(9.8%)      |

Of the liveborn babies the birthweights of 6 singletons are missing, 5 of these, 4 girls and one of unknown sex, died in the delivery room.

The two children unclassified by sex both died in the delivery room.
