# Supplementary material
Source: PubMed Central journal article supplement (PMC4790482)
Supplement: cosk004134.ww3_default.pdf [file cosk004134.ww3_default.pdf]

**Appendix 3:** Babies born between 22 and 26 weeks of gestation in 2006 in England by gestational age, sex and multiple birth admitted to Neonatal Units.. Median birthweights of babies born between 22 and 25 weeks in 1995 are given for comparison; gestational ages of babies born alive in 1995 but not admitted to neonatal unit cannot be validated and reliable weights are not available [posted as supplied by author]

**Admissions 2006**

| Admissions      | 2006                      |        |                     |          |                 | 1995#             |
|-----------------|---------------------------|--------|---------------------|----------|-----------------|-------------------|
|                 | (n) [Missing Birthweight] | Median | Interquartile range | Range    | n(%) <500 grams | Birthweight grams |
| All babies      | 22 weeks (19) - [0]       | 540    | 509-574             | 460-639  | 2(10.5%)        | 522               |
|                 | 23 weeks (216) - [1]      | 600    | 548-649             | 400-814  | 14(6.5%)        | 600               |
|                 | 24 weeks (381) - [0]      | 671    | 610-730             | 337-995  | 11(2.9%)        | 680               |
|                 | 25 weeks (498) - [0]      | 779    | 699-850             | 419-1126 | 8(1.6%)         | 760               |
|                 | 26 weeks (571) - [0]      | 879    | 787-970             | 356-1524 | 7(1.2%)         |                   |
|                 | Total (1686) - [1]        | 750    | 639-870             | 337-1524 | 42(2.5%)        | 695*              |
| Gestational age |                           |        |                     |          |                 |                   |
| 22 weeks        | boys (8) - [0]            | 541    | 515-620             | 500-639  |                 | 522               |
|                 | girls (11) - [0]          | 540    | 500-569             | 460-589  |                 | 550               |
|                 | singletons (14) - [0]     | 529    | 500-552             | 460-639  |                 | 563               |
|                 | multiples (5) - [0]       | 574    | 560-589             | 529-639  |                 | 435               |

|          |                        |     |         |          |  |     |
|----------|------------------------|-----|---------|----------|--|-----|
|          |                        |     |         |          |  |     |
| 23 weeks | boys (123) - [0]       | 620 | 575-670 | 430-814  |  | 610 |
|          | girls (93) - [1]       | 569 | 529-610 | 400-790  |  | 595 |
|          | singletons (139) - [1] | 601 | 551-649 | 400-814  |  | 620 |
|          | multiples (77) - [0]   | 579 | 545-639 | 405-810  |  | 575 |
|          |                        |     |         |          |  |     |
| 24 weeks | boys (188) - [0]       | 689 | 626-751 | 337-995  |  | 690 |
|          | girls (193) - [0]      | 660 | 600-709 | 379-865  |  | 667 |
|          | singletons (276) - [0] | 675 | 612-734 | 379-995  |  | 680 |
|          | multiples (105) - [0]  | 663 | 605-720 | 337-930  |  | 680 |
|          |                        |     |         |          |  |     |
| 25 weeks | boys (261) - [0]       | 805 | 720-879 | 453-1126 |  | 786 |
|          | girls (237) - [0]      | 750 | 685-810 | 419-1125 |  | 740 |
|          | singletons (391) - [0] | 779 | 704-860 | 469-1126 |  | 770 |
|          | multiples (107) - [0]  | 740 | 629-813 | 419-1000 |  | 728 |
|          |                        |     |         |          |  |     |
| 26 weeks | boys (284) - [0]       | 906 | 815-995 | 426-1292 |  | -   |

|       |                         |     |         |          |          |      |
|-------|-------------------------|-----|---------|----------|----------|------|
|       | girls (287) - [0]       | 851 | 773-949 | 356-1524 |          | -    |
|       | singletons (416) - [0]  | 884 | 786-977 | 356-1524 |          | -    |
|       | multiples (155) - [0]   | 860 | 787-954 | 476-1279 |          | -    |
|       |                         |     |         |          |          |      |
| Total | boys (864) - [0]        | 771 | 660-894 | 337-1292 | 14(1.6%) | 710* |
|       | girls (821) - [1]       | 730 | 620-839 | 356-1524 | 28(3.4%) | 680* |
|       | singletons (1236) - [1] | 759 | 649-879 | 356-1524 | 29(2.4%) | 700* |
|       | multiples (449) - [0]   | 720 | 620-839 | 337-1279 | 13(2.9%) | 675* |
|       |                         |     |         |          |          |      |

The birthweight of one singleton female baby born in 2006 at 23 weeks of gestation who died after admission to the Neonatal Unit during the first week is missing.

# The birthweights of 666 babies admitted to English neonatal units born before 26 completed weeks in 1995 are given for comparison.

\*Totals for 1995 do not include babies born at 26 completed weeks gestation
